# Supplementary material for: A machine learning-driven SERS platform for precise detection and analysis of vascular calcification
Source: Royal Society of Chemistry journal article supplement (doi:10.1039/d4ay01061b), 2024-01-01
Supplement: d4ay01061b1.pdf [file d4ay01061b1.pdf]

## Supporting Information

# Machine Learning-driven SERS platform for precise detection and analysis of vascular calcification

Wei Li<sup>a, b</sup>, Zhilian You<sup>b</sup>, Dawei Cao<sup>c</sup>, Naifeng Liu<sup>a\*</sup>

<sup>a</sup>Department of Cardiology, Zhongda Hospital, School of Medicine, Southeast University, Nanjing, 210009, China

<sup>b</sup>Department of Cardiology, Affiliated Hospital of Yangzhou University, Yangzhou University, Yangzhou, 225001, China

<sup>c</sup>School of Information Engineering, Yangzhou Polytechnic Institute, Yangzhou, 225002, China

\*Corresponding authors: [liunf@seu.edu.cn](mailto:liunf@seu.edu.cn)

# 1. Materials and Methods

## 1.1. Materials

Hexadecyltrimethylammonium chloride (CTAC), chloroauric acid ( $\text{HAuCl}_4$ ), cetyltriethylammonium bromide (CTAB), trisodium citrate dihydrate,  $\text{NaBH}_4$ ,  $\text{NaOH}$ ,  $\text{NaOL}$ , silver nitrate, hydroquinone solution all purchased from Sinopharm Chemical Reagent Suzhou Co. All reagents were analytical grade and were used as received without further purification.

## 1.2. Preparation of GNBP

GNBP used in the experiment was prepared via a seed-mediated method (Huang et al., 2014). Firstly, CTAC (66 mM, 4 mL) was mixed with  $\text{HAuCl}_4$  (1 mM, 1 mL) followed by adding  $\text{HNO}_3$  solution (10 mM, 1 mL). After 15 min of vigorous agitation at 800 r/min,  $\text{NaBH}_4$ - $\text{NaOH}$  mixed solution (v:v=1:1, 1 mL) and trisodium citrate dihydrate solution (1 M, 100  $\mu\text{L}$ ) were added. Thus, the seed solution was prepared after 1 h aging in an 80 °C water bath. Subsequently, deionized water (19 mL), CTAB (0.91 g) and  $\text{NaOL}$  (0.038 g) were mixed in a breaker under vigorous stirring at 800 r/min,  $\text{HAuCl}_4$  (0.5 mM, 6.25 mL) and silver nitrate (2 mM, 1.5 mL) were added sequentially during vigorous stirring at 800 r/min. Then,  $\text{HCl}$  solution (0.5 M, 0.5 mL), hydroquinone solution (0.1 M, 10 mL) and the seed solution (150  $\mu\text{L}$ ) were added sequentially after the color of the solution turns from yellow to colorless. The reaction should last for 24 h. After two consecutive centrifugations and washing, the reaction solution was added to deionized water to obtain a successfully prepared GNBP solution.

### **1.3. GNBP substrate fabrication**

PDMS substrate was prepared in the cleaned Petri dishes. Prepolymer gel (15 mL) and curing agent (2 mL) were mixed in the Petri dish and placed in the vacuum box for 1 h. Following, the PDMS substrates were peeled off and cut into small piece for further use. The GNBP substrate was fabricated via the liquid–liquid interface assembly strategy. Briefly, n-hexane (6 mL) and GNBP solution (6 mL) were added into the breaker followed by adding ethanol (4 mL) dropwise to act as the inducer of self-assembly. After 2 min, a dense metallic luster nanofilm was formed and the prepared PDMS was applied to transfer the nanofilm; thus, the GNBP substrate was prepared.

### **1.4. Establishment of VC rat model**

All animal experiments were conducted in accordance with the "Guidelines for the Care and Use of Laboratory Animals" of Yangzhou University. These experiments were approved by the Experimental Animal Welfare and Ethics Committee of Yangzhou University (Approval No. 202304001). Fifty rats were divided into healthy group (HL) and vascular calcification (VC) group, with twenty-five rats in each group. Rats in VC group were intraperitoneally injected with vitamin D<sub>3</sub> ( $3 \times 10^5$  IU/kg) once a day for 30 days, while rats in HL group were intraperitoneally injected with the same volume of olive oil once a day for 30 days. After the construction of the model, the rats in each group were anesthetized with Aferdine (10 ml/kg) and scanned by CT to evaluate the calcification of aorta. After 30 days of first injection, all rats were euthanized with sodium pentobarbital (150 mg/kg), and the aortic arch-thoracic aorta-

abdominal aorta were carefully isolated the rats for alizarin red staining to evaluate aortic calcification. Some of the thoracic aorta of rats were taken and embedded in paraffin to make tissue sections for HE staining and Von Kossa staining to assess the calcium deposits in the thoracic aorta.

### **1.5. SERS measurement and characterization**

Transmission electron microscopy (TEM) observation was obtained by using a FEI Tecnai G2 F30 S-twin field-emission transmission electron microscopy. The scanning electron microscopy (SEM) image was obtained via Hitachi S-4800II field emission scanning electron microscope. UV-Vis absorption spectra were recorded with a Shimadzu UV3600 spectroscopy. Raman measurements were conducted with a Thermo Fisher DXR Smart Raman spectrometer. A laser with the wavelength of 785 nm was applied as the excitation source with the laser power and collection time of 80 mW and 10 s, respectively.

### **1.6. Multivariate analysis**

To enhance the signal-to-noise ratio of the raw SERS spectra, eliminate background interference, and correct for instrument effects, all raw SERS spectral data were preprocessed sequentially using Origin software. The preprocessing steps included Raman shift truncation, Savitzky-Golay smoothing, airPLS baseline correction, and normalization. The Raman shift range from 600 to 1800  $\text{cm}^{-1}$  was truncated in the SERS spectra. Savitzky-Golay smoothing algorithm was employed to smooth the spectral data, with a smoothing window size of 12 data points and a polynomial order of 3. Adaptive Iteratively Reweighted Penalized Least Squares (airPLS) was used for

baseline correction, with a smoothing parameter  $\lambda$  set to 10 and the number of iterations set to 30. The spectral data was then normalized to a common scale (0-1). We performed an average value analysis on the normalized SERS spectra of the VC rat group (n=25) and the HL rat group (n=25), resulting in their representative spectra. The representative spectrum of HL rat serum was subtracted from the representative spectrum of VC rat serum to obtain the differential SERS spectrum between the two. The differences between VC and HL rats were preliminarily analyzed through the characteristic peaks of the differential SERS spectrum using Origin software. To further distinguish between the SERS spectra, a diagnostic and identification model for VC was established using PCA-LDA method. For PCA, the Scree Plot, Score Plot, Loading Plot, and Box Plot were analyzed by Origin software. The Scree Plot showed the percentage of variance explained by each principal component and the cumulative variance explained, indicating how many principal components were needed to capture a significant amount of the total variance in the SERS dataset. After PCA, the information content of different numbers of PCs was used as input for LDA. When PCs was 13, accounting for 92.7% of the total variance, the model has the highest accuracy. The accuracy, sensitive, specificity, and AUC of the model were analyzed by MATLAB software. Meanwhile, the model was also compared with commonly used models such as SVM, KNN, DT, LR, NB, ANN, PCA-ANN, PCA-KNN, and PCA-SVM. In this study, the input layer of the ANN model contained 1,200 nodes, corresponding to the Raman spectral features in the  $600 \sim 1800 \text{ cm}^{-1}$  range. The model was designed with three hidden layers, containing 512, 256, and 128 nodes,

respectively. Each layer employed ReLU activation functions to effectively process nonlinear data and extract complex features. To prevent overfitting and improve the model's generalization ability, L2 regularization was applied with a strength ( $\lambda$ ) of 0.001. Additionally, the training iterations (epochs) were set to 200 to ensure optimal performance. The output layer contained a single node, using a sigmoid activation function for the binary classification task of predicting vascular calcification.

## 2. Results and discussion

### 2.1. Characterization of GNBP's substrate

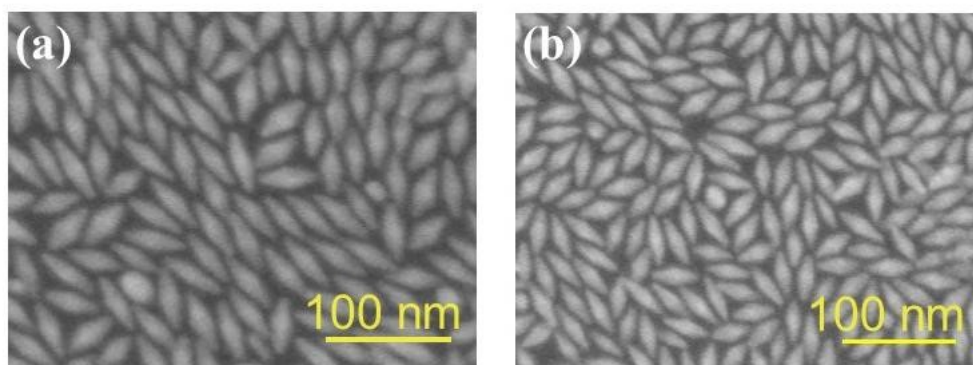

**Fig. S1** Optical images of the substrate before and after adding samples. (a) SEM image of GNBP's substrate. (b) SEM image of GNBP's Substrates after adding the sample.

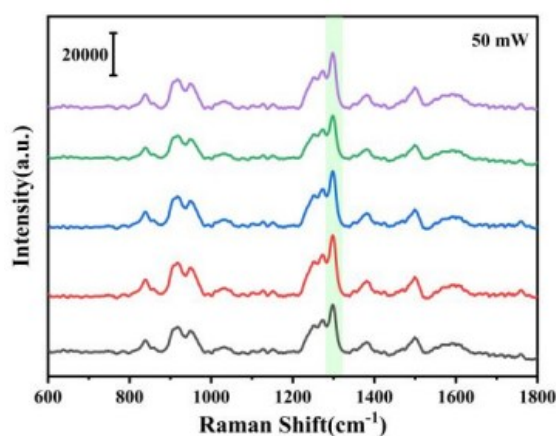

**Fig. S2** Repeatability of laser power at 50 mW.

### 2.2. Comparison of SERS spectra between VC and HL rat serum

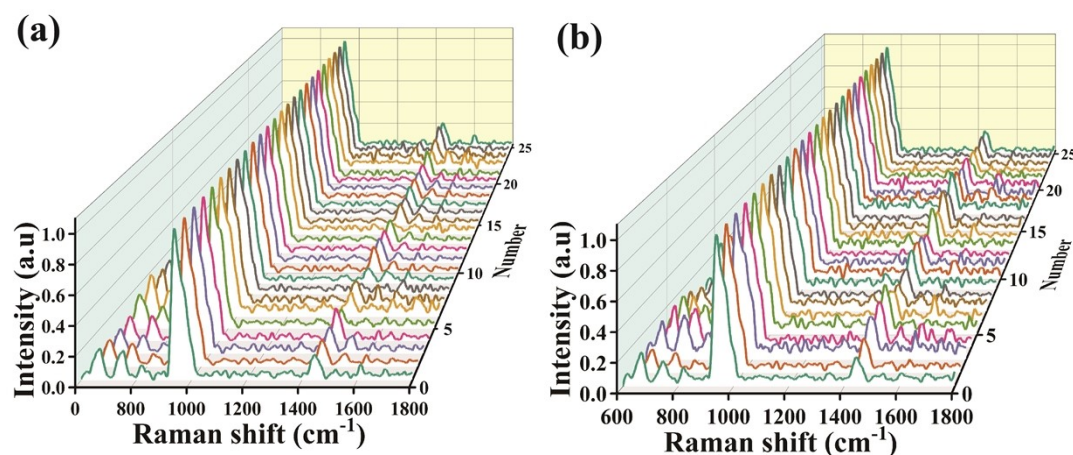

**Fig. S3** (a) SERS Spectra of Pre-treated HL Rats (n=25). (b) SERS Spectra of Pre-treated vc Rats (n=25).

### 2.3. Multivariate analysis

**Table S1** SERS peak positions and vibrational mode assignments based on the Reference

| Raman shift<br>(cm <sup>-1</sup> ) | Assignment                                                                                                               | Reference |
|------------------------------------|--------------------------------------------------------------------------------------------------------------------------|-----------|
| 612                                | Cholesterol                                                                                                              | 1         |
| 663                                | C-S stretching mode of cystine                                                                                           | 2         |
| 757                                | Tryptophan, Phosphatidylethanolamine                                                                                     | 3         |
| 816                                | Proline, hydroxyproline, tyrosine, $\nu_2$ PO <sub>2</sub> <sup>-</sup> stretch of nucleic acids                         | 4         |
| 846                                | Monosaccharides ( $\alpha$ -glucose), (C-O-C) skeletal mode                                                              | 5         |
| 891                                | Saccharide band                                                                                                          | 1         |
| 952                                | $\nu_s$ (CH <sub>3</sub> ) of proteins ( $\alpha$ -helix)                                                                | 6         |
| 979                                | C-C stretching $\beta$ -sheet (proteins)                                                                                 | 7         |
| 1000                               | Phenylalanine, Bound & free NADH                                                                                         | 8         |
| 1033                               | Phenylalanine mode, C-H in-plane phenylalanine (proteins)<br>$\nu$ (CO) $\nu$ (CC) $\nu$ (CCO) (polysaccharides, pectin) | 5, 7, 9   |
| 1094                               | Lipid, $\nu$ (C-N)                                                                                                       | 10        |
| 1121                               | The strong C-O band of ribose                                                                                            | 11        |
| 1139                               | Palmitic acid, Fatty acid                                                                                                | 1         |

|      |                                                                                                                                     |                |
|------|-------------------------------------------------------------------------------------------------------------------------------------|----------------|
| 1157 | Carotenoids (absent in normal tissue)                                                                                               | 12             |
| 1204 | Amide III & CH <sub>2</sub> wagging vibrations from glycine backbone & proline side chains, Collagen, Tyrosine, phenylalanine (IgG) | 6, 11, 13, 14, |
| 1314 | CH <sub>3</sub> CH <sub>2</sub> twisting mode of collagen                                                                           | 15             |
| 1357 | Tryptophan                                                                                                                          | 4              |
| 1450 | CH <sub>2</sub> bending, C-H deformation bands, Bending modes of methyl groups                                                      | 16, 17         |
| 1532 | Carotenoid (absent in normal tissues)                                                                                               | 12             |
| 1620 | $\nu$ (C=C), porphyrin                                                                                                              | 18             |
| 1655 | Amide I (proteins), C=O stretching (lipids)                                                                                         | 7              |
| 1708 | One of absorption positions for the C=O stretching vibrations of cortisone                                                          | 19             |
| 1746 | C=O stretch (lipid)                                                                                                                 | 20             |

Fig. S4 showed the difference in spectral intensity between VC rat and HL rat at 663, 757, 846, 979, 1000, and 1450 cm<sup>-1</sup>. In each figure, the data points for the HL rat group (gray) and the VC rat group (red) represented the Raman intensity values of different samples. The plot indicated that the spectral intensity of VC rat was generally higher than that of HL rat at all key characteristic peaks, especially at 757, 846, 1000, and 1450 cm<sup>-1</sup>, where the differences were particularly pronounced. These significant differences suggested that these characteristic peaks played a key role in distinguishing between vascular calcification and healthy states. The plot also marked the 25%-75% quartile range and the median line, further highlighting the differences between the two groups. The spectral intensity distribution of VC rat was broader and generally higher, reflecting the changes in chemical composition under pathological conditions.



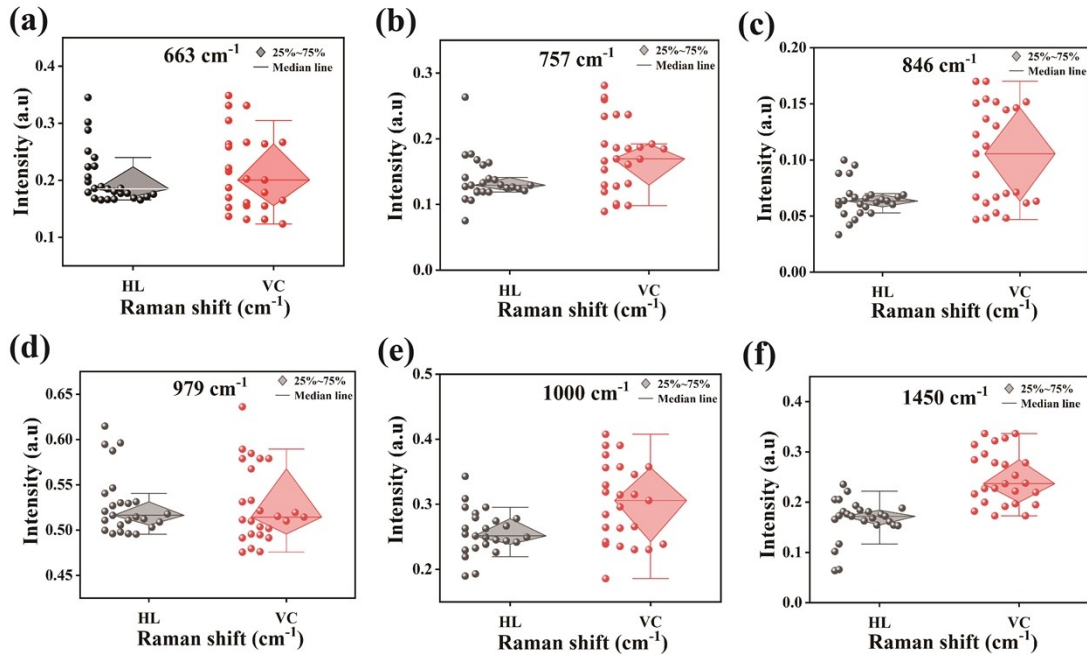

**Fig. S4** The scatter plots of key characteristic peaks in the loading plots of PC1, and PC2 distinguished VC rats and HL rats. (a)  $663 \text{ cm}^{-1}$ , (b)  $757 \text{ cm}^{-1}$ , (c)  $846 \text{ cm}^{-1}$ , (d)  $979 \text{ cm}^{-1}$ , (e)  $1000 \text{ cm}^{-1}$ , and (e)  $1450 \text{ cm}^{-1}$ .

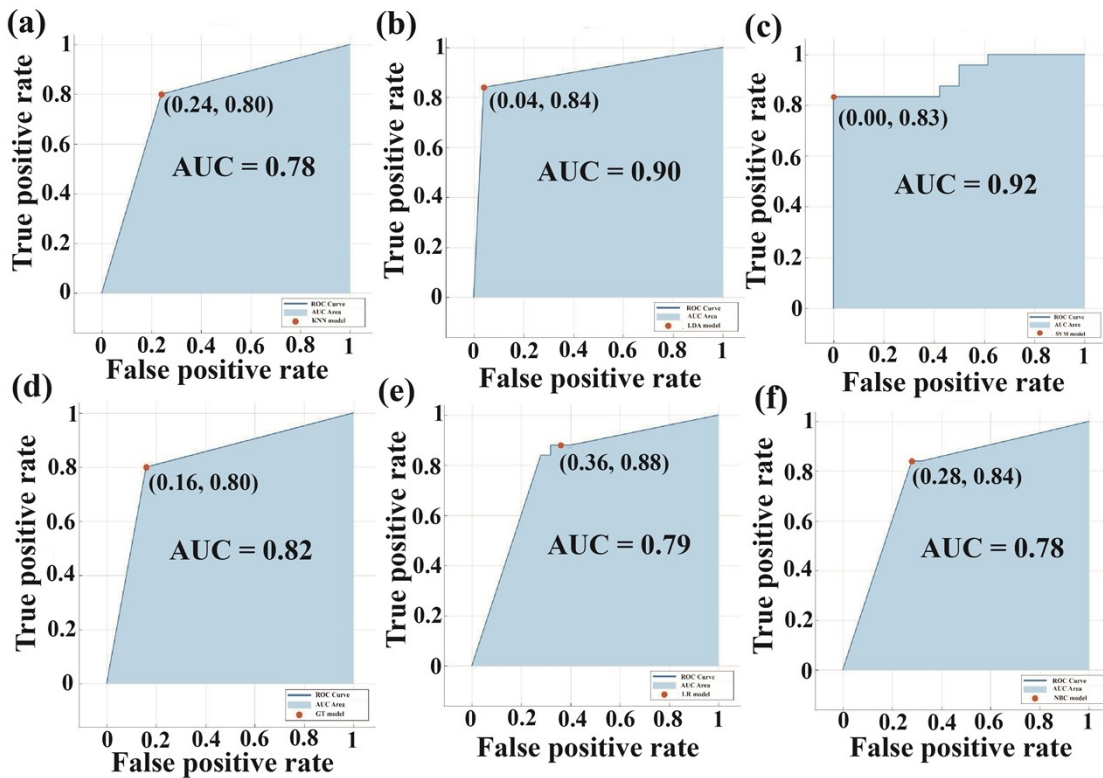

**Fig. S5.** The AUC values of (a) KNN, (b) LDA, (c) SVM, (d) DT, (e) LR, (f) NB.

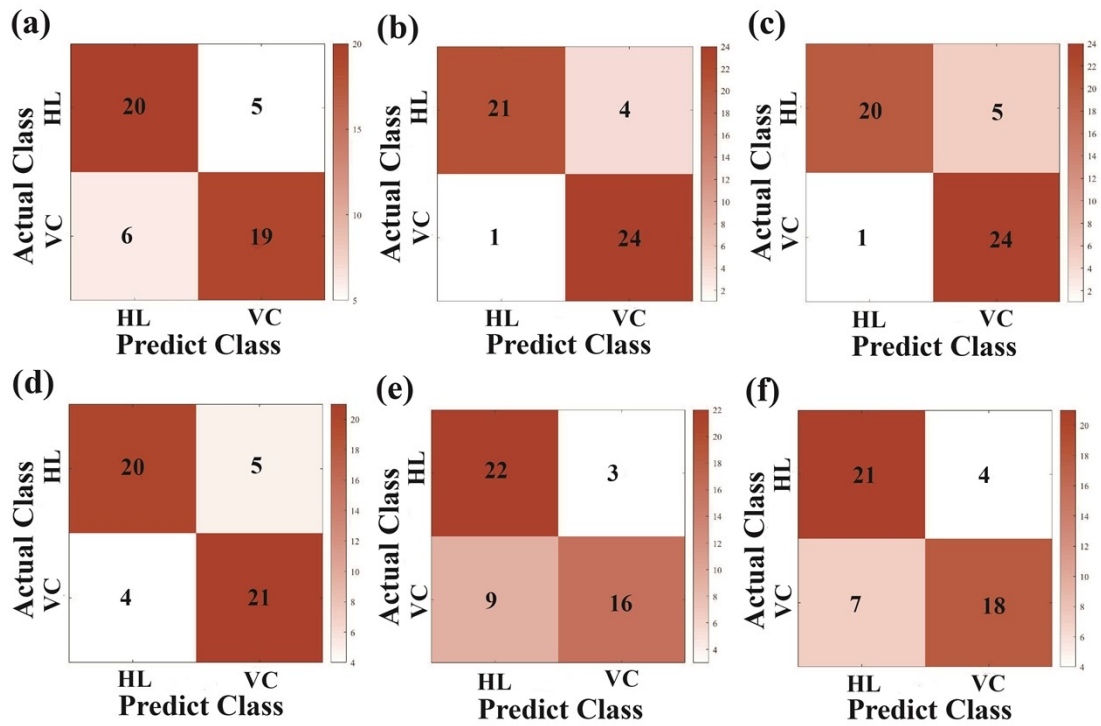

**Fig. S6.** The confusion matrices of (a) KNN, (b) LDA, (c) SVM, (d) DT, (e) LR, (f) NB.

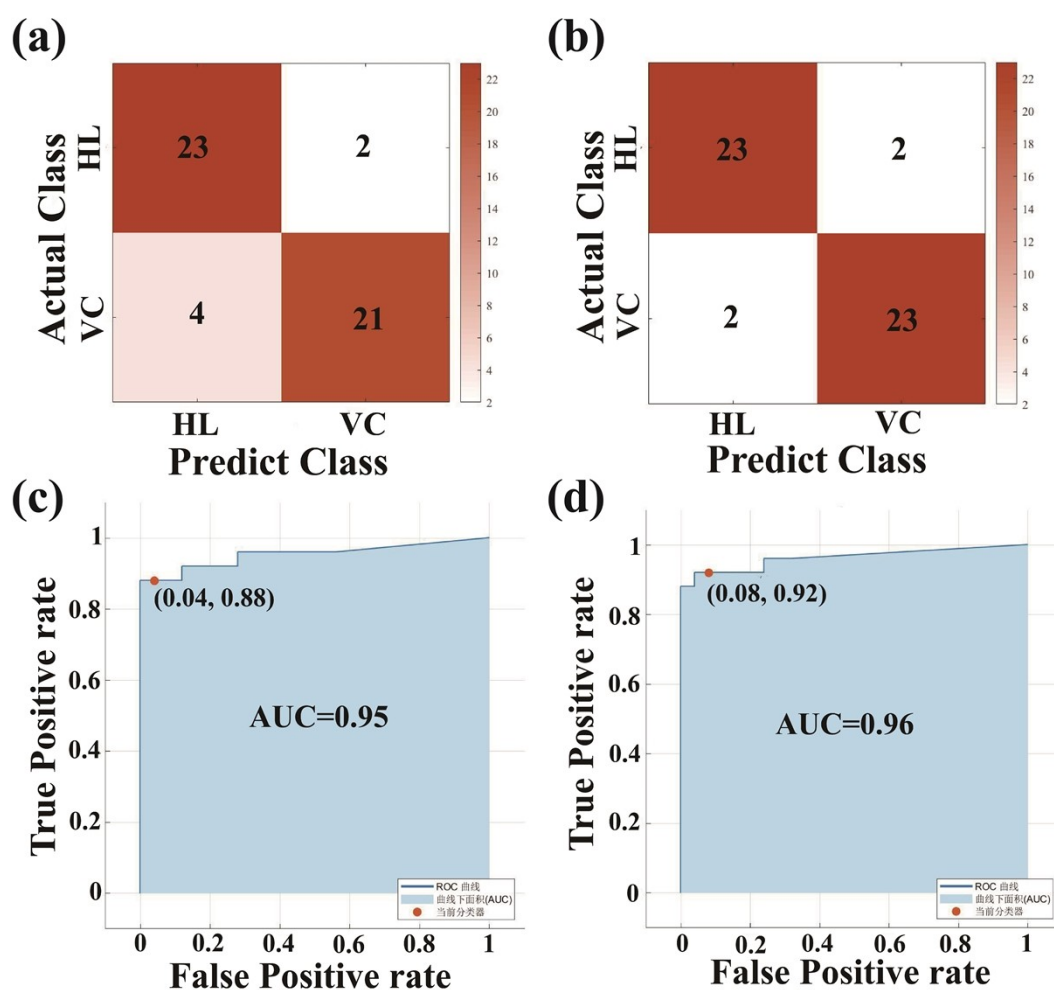

**Fig. S7** The confusion matrices of (a) ANN, (b) PCA-ANN. The AUC values of (c) ANN, (d) PCA-ANN.

## Reference

1. C. Krafft, L. Neudert, T. Simat and R. Salzer, *Spectrochim. Acta A*, 2005, **61**, 1529-1535.
2. N. Stone, C. Kendell, N. Shepherd, P. Crow and H. Barr, *J. Raman Spectrosc.*, 2002, **33**, 564-573.
3. N. Stone, C. Kendall, J. Smith, P. Crow and H. Barr, *Faraday Discuss.*, 2004, **126**, 141-157.
4. W. T. Cheng, M. T. Liu, H. N. Liu and S. Y. Lin, *Microsc. Res. Tech.*, 2005, **68**, 75-79.
5. G. Shetty, C. Kedall, N. Shepherd, N. Stone and H. Barr, *Br. J. Cancer*, 2006, **94**, 1460-1464.

6. R. J. Lakshimi, V. B. Kartha, C. M. Krishna, J. G. R. Solomon, G. Ullas and P. UmaDevi, *Radiat. Res.*, 2002, **157**, 175-182.
7. I. Notingher, C. Green and C. Dyer, *J. R. Soc. Interface*, 2004, **1**, 79-90.
8. R. Malini, K. Venkatakrishma and J. Kurien, *Biopolymers*, 2006, **81**, 179-193.
9. J. W. Chan, D. S. Taylor, T. Zwerdling, S. T. Lane, K. Ihara and T. Huser, *Biophys. J.*, 2006, **90**, 648-656.
10. S. M. Ronen, A. Stier and H. Degani, *FEBS Lett.*, 1990, **266**, 147-149.
11. R. K. Dukor, *Biomed. Appl.*, 2002, **5**, 3335-3359.
12. A. Mahadevan-Jansen and R. Richards-Kortum, *IEEE EMBS Chicago*, Oct 30-Nov 2, **1997**.
13. G. I. Dovbeshko, N. Y. Gridina, E. B. Kruglova and O. P. Pashchuk, *Talanta*, 2000, **53**, 233-246.
14. P. G. L. Andrus and R. D. Strickland, *Biospectroscopy*, 1998, **4**, 37-46.
15. D. P. Lau, Z. Huang, H. Lui, C. S. Man, K. Berean, M. D. Morrison and H. Zeng, *Lasers Surg. Med.*, 2003, **32**, 210-214.
16. S. Sigurdsson, P. A. Philipsen, L. K. Hansen, L. Laesen, M. Gniadecka and H. C. Wulf, *IEEE Trans. Biomed. Eng.*, 2004, **51**, 10.
17. Y. Y. Tan, A. G. Shen, J. W. Zhang, N. Wu, L. Feng, Q. F. Wu, Y. Ye and J. M. Hu, *Machine Learning & Cybernetics*, Nov 2-5, **2003**.
18. E. Kateinen, M. Elomaa, U.-M. Laakkonen, E. Sippola, P. Niemela, J. Suhonen and K. Jarninen, *J. Forensic Sci.*, 2007, **52**, 88-92.
19. R. A. Shaw and H. H. Mantsch, *J. Mol. Struct.*, 1999, **13**, 480-481.
20. N. Stone, C. Kendall, J. Smith, P. Crow and H. Barr, *Faraday Discuss.*, 2004, **126**, 141-157.
